# Supplementary material for: IBD risk loci are enriched in multigenic regulatory modules encompassing putative causative genes
Source: Springer Nature journal article supplement (doi:10.1038/s41467-018-04365-8), 2018-06-15
Supplement: MOESM2 [file 41467_2018_4365_MOESM2_ESM.pdf › 41467_2018_4365_MOESM2_ESM.pdf]

## **Description of Additional Supplementary Files**

File Name: Supplementary Data 1

Description: List of 23,650 cis-eQTL (FDR < 0.05) detected in the CEDAR cohort.

File Name: Supplementary Data 2

Description: List of cis-acting regulatory modules (cRM) detected in the CEDAR cohort

File Name: Supplementary Data 3

Description: List of genes controlled by the same cRM in multiple tissues yet in opposite direction ( $\vartheta < -0.6$ ).

File Name: Supplementary Data 4

Description: List of EAP with  $|\vartheta| \geq 0.6$  with a DAP for either CD (sheet 1) or UC (sheet 2).

File Name: Supplementary Data 5

Description: Genes with reported eQTL effect potentially related to GWAS association signal for IBD that were not selected in this work.

File Name: Supplementary Data 6

Description: List of 4,476 variants detected by resequencing 521 coding exons of 42 candidate genes in 6,597 CD cases and 5,502 controls.

File Name: Supplementary Data 7

Description: Results of gene-based and module-based burden tests for rare (MAF < 0.005) disruptive (NS = LoF + damaging missense) and synonymous (S) variants.

File Name: Supplementary Data 8

Description: Primers used for targeted exon sequencing.
